# Supplementary material
Source: MDPI journal article supplement (https://www.mdpi.com/2297-8739/10/9/483)
Supplement: s1 [file s1]

**Supplementary Table 1.** GC/MS analysis of the control and fractions of Azorean *Cryptomeria japonica* foliage essential oil obtained by HD.

| Components                     | RI   | Relative Content (%) |              |              |              |              |              |              |
|--------------------------------|------|----------------------|--------------|--------------|--------------|--------------|--------------|--------------|
|                                |      | Control              | Fr1          | Fr2          | Fr3          | Fr4          | Fr5          | Fr6          |
| Monoterpene Hydrocarbons       |      |                      |              |              |              |              |              |              |
| Tricyclene                     | 918  | 0.18 ± 0.01          | 0.91 ± 0.08  | 0.39 ± 0.06  | 0.20 ± 0.04  | 0.14 ± 0.04  | 0.17 ± 0.03  | 0.10 ± 0.03  |
| alpha-Thujene                  | 921  | 0.10 ± 0.01          | 0.57 ± 0.01  | 0.26 ± 0.01  | 0.15 ± 0.03  | 0.11 ± 0.01  | 0.14 ± 0.02  | 0.09 ± 0.00  |
| alpha-Pinene                   | 928  | 11.64 ± 0.15         | 54.18 ± 0.67 | 24.12 ± 0.51 | 12.48 ± 0.42 | 8.48 ± 0.45  | 10.15 ± 0.56 | 6.35 ± 0.38  |
| alpha-Fenchene                 | 942  | 0.01 ± 0.00          | 0.08 ± 0.00  | 0.04 ± 0.00  | 0.02 ± 0.00  | 0.02 ± 0.00  | 0.02 ± 0.00  | 0.01 ± 0.00  |
| Camphene                       | 944  | 1.07 ± 0.10          | 4.99 ± 0.13  | 2.60 ± 0.07  | 1.58 ± 0.07  | 1.07 ± 0.05  | 1.17 ± 0.07  | 0.60 ± 0.05  |
| Sabinene                       | 967  | 1.77 ± 0.05          | 10.25 ± 0.09 | 5.16 ± 0.67  | 2.29 ± 0.13  | 1.01 ± 0.11  | 0.79 ± 0.07  | 0.26 ± 0.01  |
| beta-Pinene                    | 972  | 0.71 ± 0.05          | 3.26 ± 0.15  | 1.95 ± 0.12  | 1.08 ± 0.06  | 0.64 ± 0.07  | 0.67 ± 0.07  | 0.35 ± 0.03  |
| Myrcene                        | 983  | 1.61 ± 0.08          | 7.45 ± 0.18  | 3.88 ± 0.11  | 2.07 ± 0.08  | 1.32 ± 0.08  | 1.45 ± 0.07  | 0.78 ± 0.02  |
| alpha-Phellandrene             | 1002 | 0.01 ± 0.00          | 0.03 ± 0.00  | 0.02 ± 0.00  | 0.01 ± 0.00  | 0.01 ± 0.00  | 0.02 ± 0.00  | 0.01 ± 0.00  |
| delta-3-Carene                 | 1004 | 0.17 ± 0.02          | 1.10 ± 0.08  | 0.59 ± 0.01  | 0.31 ± 0.01  | 0.21 ± 0.00  | 0.25 ± 0.00  | 0.14 ± 0.00  |
| alpha-Terpinene                | 1012 | 0.11 ± 0.00          | 0.15 ± 0.00  | 0.21 ± 0.01  | 0.24 ± 0.01  | 0.21 ± 0.01  | 0.25 ± 0.01  | 0.14 ± 0.00  |
| para-Cymene                    | 1019 | 0.01 ± 0.00          | 0.04 ± 0.00  | 0.03 ± 0.00  | 0.02 ± 0.00  | 0.02 ± 0.00  | 0.02 ± 0.00  | 0.01 ± 0.00  |
| Limonene                       | 1024 | 1.74 ± 0.09          | 7.16 ± 0.20  | 4.61 ± 0.16  | 2.52 ± 0.12  | 1.52 ± 0.09  | 1.57 ± 0.09  | 0.82 ± 0.07  |
| beta-Phellandrene              | 1025 | 0.23 ± 0.01          | 0.95 ± 0.08  | 0.64 ± 0.08  | 0.34 ± 0.02  | 0.21 ± 0.01  | 0.23 ± 0.01  | 0.11 ± 0.01  |
| gamma-Terpinene                | 1052 | 0.18 ± 0.04          | 0.25 ± 0.01  | 0.36 ± 0.03  | 0.38 ± 0.03  | 0.34 ± 0.03  | 0.40 ± 0.03  | 0.22 ± 0.01  |
| Terpinolene                    | 1080 | 0.14 ± 0.05          | 0.42 ± 0.04  | 0.37 ± 0.04  | 0.23 ± 0.01  | 0.16 ± 0.02  | 0.18 ± 0.02  | 0.10 ± 0.00  |
| % Total MHs                    |      | 19.68 ± 0.32         | 91.79 ± 0.94 | 45.23 ± 0.41 | 23.92 ± 0.31 | 15.47 ± 0.28 | 17.48 ± 0.34 | 10.09 ± 0.22 |
| Oxygen-Containing Monoterpenes |      |                      |              |              |              |              |              |              |
| trans-Sabinene hydrate         | 1064 | 0.01 ± 0.00          | 0.02 ± 0.00  | 0.05 ± 0.00  | 0.03 ± 0.00  | 0.01 ± 0.00  | 0.00 ± 0.00  | 0.00 ± 0.00  |
| Linalool                       | 1094 | 0.10 ± 0.00          | 0.10 ± 0.00  | 0.41 ± 0.05  | 0.30 ± 0.04  | 0.11 ± 0.04  | 0.06 ± 0.00  | 0.02 ± 0.00  |
| cis-Sabinene hydrate           | 1096 | 0.01 ± 0.00          | 0.01 ± 0.00  | 0.04 ± 0.00  | 0.03 ± 0.00  | 0.01 ± 0.01  | 0.01 ± 0.00  | 0.00 ± 0.00  |
| cis-para-Menth-2-en-1-ol       | 1119 | 0.03 ± 0.00          | 0.00 ± 0.00  | 0.04 ± 0.00  | 0.02 ± 0.00  | 0.05 ± 0.00  | 0.04 ± 0.00  | 0.02 ± 0.00  |
| trans-para-Menth-2-en-1-ol     | 1136 | 0.02 ± 0.00          | 0.00 ± 0.00  | 0.03 ± 0.00  | 0.01 ± 0.00  | 0.04 ± 0.00  | 0.03 ± 0.00  | 0.02 ± 0.00  |
| Camphor                        | 1141 | 0.05 ± 0.00          | 0.03 ± 0.00  | 0.13 ± 0.02  | 0.10 ± 0.00  | 0.03 ± 0.00  | 0.00 ± 0.00  | 0.01 ± 0.00  |
| Camphene hydrate               | 1149 | 0.06 ± 0.00          | 0.03 ± 0.00  | 0.19 ± 0.03  | 0.16 ± 0.02  | 0.06 ± 0.00  | 0.03 ± 0.00  | 0.00 ± 0.00  |
| Borneol                        | 1166 | 0.06 ± 0.00          | 0.00 ± 0.00  | 0.06 ± 0.00  | 0.08 ± 0.00  | 0.05 ± 0.00  | 0.02 ± 0.00  | 0.01 ± 0.00  |
| Terpinen-4-ol                  | 1175 | 0.65 ± 0.08          | 0.17 ± 0.01  | 0.97 ± 0.06  | 1.40 ± 0.10  | 1.16 ± 0.09  | 0.98 ± 0.09  | 0.64 ± 0.08  |
| alpha-Terpineol                | 1189 | 0.10 ± 0.00          | 0.00 ± 0.00  | 0.07 ± 0.00  | 0.14 ± 0.04  | 0.17 ± 0.07  | 0.18 ± 0.04  | 0.19 ± 0.05  |
| trans-Piperitol                | 1203 | 0.01 ± 0.00          | 0.00 ± 0.00  | 0.00 ± 0.00  | 0.01 ± 0.00  | 0.01 ± 0.00  | 0.00 ± 0.00  | 0.00 ± 0.00  |
| Linalyl acetate                | 1243 | 0.05 ± 0.00          | 0.15 ± 0.04  | 0.21 ± 0.01  | 0.06 ± 0.00  | 0.02 ± 0.00  | 0.02 ± 0.00  | 0.02 ± 0.00  |
| Bornyl acetate                 | 1277 | 1.72 ± 0.10          | 2.32 ± 0.18  | 6.32 ± 0.26  | 3.92 ± 0.13  | 2.11 ± 0.11  | 1.48 ± 0.10  | 0.86 ± 0.07  |
| Isobornyl acetate              | 1280 | 0.05 ± 0.00          | 0.05 ± 0.00  | 0.13 ± 0.00  | 0.09 ± 0.00  | 0.05 ± 0.00  | 0.03 ± 0.00  | 0.02 ± 0.00  |
| alpha-Terpinyl acetate         | 1339 | 0.09 ± 0.00          | 0.08 ± 0.00  | 0.33 ± 0.04  | 0.20 ± 0.01  | 0.12 ± 0.02  | 0.07 ± 0.00  | 0.05 ± 0.00  |

| % Total OCM                      |      | 3.01 ± 0.09  | 2.96 ± 0.16 | 8.98 ± 0.35  | 6.55 ± 0.33  | 4.00 ± 0.27  | 2.95 ± 0.19  | 1.86 ± 0.14  |
|----------------------------------|------|--------------|-------------|--------------|--------------|--------------|--------------|--------------|
| Sesquiterpene Hydrocarbons       |      |              |             |              |              |              |              |              |
| delta-Elemene                    | 1328 | 0.02 ± 0.00  | 0.02 ± 0.00 | 0.11 ± 0.01  | 0.06 ± 0.00  | 0.02 ± 0.00  | 0.00 ± 0.00  | 0.00 ± 0.00  |
| beta-Elemene                     | 1382 | 0.10 ± 0.02  | 0.09 ± 0.00 | 0.46 ± 0.05  | 0.23 ± 0.01  | 0.09 ± 0.00  | 0.04 ± 0.01  | 0.03 ± 0.00  |
| Junipene                         | 1402 | 0.02 ± 0.00  | 0.02 ± 0.00 | 0.08 ± 0.00  | 0.03 ± 0.00  | 0.01 ± 0.00  | 0.00 ± 0.00  | 0.00 ± 0.00  |
| beta-Caryophyllene               | 1412 | 0.04 ± 0.00  | 0.09 ± 0.00 | 0.26 ± 0.01  | 0.09 ± 0.00  | 0.03 ± 0.00  | 0.01 ± 0.00  | 0.01 ± 0.00  |
| gamma-Elemene                    | 1422 | 0.03 ± 0.00  | 0.00 ± 0.00 | 0.16 ± 0.01  | 0.08 ± 0.00  | 0.03 ± 0.00  | 0.00 ± 0.00  | 0.00 ± 0.00  |
| trans-beta-Farnesene             | 1445 | 0.04 ± 0.00  | 0.06 ± 0.00 | 0.20 ± 0.01  | 0.07 ± 0.00  | 0.02 ± 0.00  | 0.00 ± 0.00  | 0.00 ± 0.00  |
| alpha-Humulene                   | 1448 | 0.02 ± 0.00  | 0.04 ± 0.00 | 0.13 ± 0.01  | 0.06 ± 0.00  | 0.02 ± 0.00  | 0.00 ± 0.00  | 0.00 ± 0.00  |
| 10-beta-H-Cadina-1(6),4-diene    | 1464 | 0.01 ± 0.00  | 0.00 ± 0.00 | 0.00 ± 0.00  | 0.03 ± 0.00  | 0.04 ± 0.00  | 0.02 ± 0.00  | 0.01 ± 0.00  |
| trans-Cadina-1(6),4-diene        | 1467 | 0.03 ± 0.00  | 0.02 ± 0.00 | 0.10 ± 0.00  | 0.08 ± 0.00  | 0.04 ± 0.00  | 0.03 ± 0.00  | 0.01 ± 0.00  |
| Germacrene D                     | 1473 | 0.15 ± 0.03  | 0.20 ± 0.01 | 0.78 ± 0.003 | 0.36 ± 0.05  | 0.12 ± 0.01  | 0.04 ± 0.00  | 0.02 ± 0.00  |
| trans-Muurolo-4(14),5-diene      | 1484 | 0.02 ± 0.00  | 0.00 ± 0.00 | 0.02 ± 0.00  | 0.04 ± 0.00  | 0.03 ± 0.00  | 0.01 ± 0.00  | 0.01 ± 0.00  |
| alpha-Muuroloene                 | 1490 | 0.10 ± 0.00  | 0.03 ± 0.00 | 0.26 ± 0.01  | 0.31 ± 0.03  | 0.17 ± 0.04  | 0.07 ± 0.00  | 0.06 ± 0.00  |
| beta-Dihydroagarofuran           | 1497 | 0.04 ± 0.00  | 0.00 ± 0.00 | 0.00 ± 0.00  | 0.00 ± 0.00  | 0.00 ± 0.00  | 0.03 ± 0.00  | 0.06 ± 0.00  |
| beta-Bisabolene                  | 1499 | 0.02 ± 0.00  | 0.00 ± 0.00 | 0.07 ± 0.00  | 0.04 ± 0.00  | 0.01 ± 0.00  | 0.00 ± 0.00  | 0.00 ± 0.00  |
| gamma-Cadinene                   | 1505 | 0.13 ± 0.00  | 0.06 ± 0.00 | 0.42 ± 0.04  | 0.34 ± 0.03  | 0.17 ± 0.02  | 0.09 ± 0.00  | 0.06 ± 0.00  |
| delta-Cadinene                   | 1510 | 1.07 ± 0.08  | 0.23 ± 0.01 | 1.98 ± 0.10  | 2.62 ± 0.15  | 1.71 ± 0.11  | 0.86 ± 0.02  | 0.54 ± 0.05  |
| beta-Guaiene                     | 1514 | 0.02 ± 0.00  | 0.00 ± 0.00 | 0.00 ± 0.00  | 0.00 ± 0.00  | 0.00 ± 0.00  | 0.00 ± 0.00  | 0.00 ± 0.00  |
| trans-Cadina-1,4-diene           | 1524 | 0.01 ± 0.00  | 0.00 ± 0.00 | 0.04 ± 0.00  | 0.03 ± 0.00  | 0.02 ± 0.00  | 0.00 ± 0.00  | 0.01 ± 0.00  |
| alpha-Cadinene                   | 1528 | 0.03 ± 0.00  | 0.01 ± 0.00 | 0.09 ± 0.00  | 0.08 ± 0.00  | 0.05 ± 0.00  | 0.03 ± 0.00  | 0.02 ± 0.00  |
| Germacrene B                     | 1550 | 0.05 ± 0.00  | 0.06 ± 0.00 | 0.29 ± 0.01  | 0.17 ± 0.02  | 0.08 ± 0.00  | 0.04 ± 0.00  | 0.02 ± 0.00  |
| beta-Oplophenone                 | 1594 | 0.08 ± 0.00  | 0.00 ± 0.00 | 0.06 ± 0.00  | 0.14 ± 0.02  | 0.17 ± 0.02  | 0.16 ± 0.01  | 0.15 ± 0.02  |
| % Total SHs                      |      | 2.03 ± 0.18  | 0.93 ± 0.09 | 5.51 ± 0.36  | 4.86 ± 0.45  | 2.83 ± 0.36  | 1.43 ± 0.21  | 1.01 ± 0.08  |
| Oxygen-Containing Sesquiterpenes |      |              |             |              |              |              |              |              |
| Cubebol                          | 1507 | 0.01 ± 0.00  | 0.00 ± 0.00 | 0.07 ± 0.00  | 0.05 ± 0.00  | 0.01 ± 0.00  | 0.00 ± 0.00  | 0.00 ± 0.00  |
| Hedycaryol                       | 1526 | 0.03 ± 0.00  | 0.00 ± 0.00 | 0.00 ± 0.00  | 0.03 ± 0.00  | 0.04 ± 0.00  | 0.03 ± 0.00  | 0.00 ± 0.00  |
| Elemol                           | 1541 | 27.47 ± 0.32 | 2.11 ± 0.10 | 18.10 ± 0.28 | 28.55 ± 0.31 | 30.07 ± 0.26 | 25.62 ± 0.29 | 24.78 ± 0.36 |
| (E)-Nerolidol                    | 1552 | 0.14 ± 0.03  | 0.01 ± 0.00 | 0.13 ± 0.00  | 0.15 ± 0.03  | 0.13 ± 0.02  | 0.08 ± 0.00  | 0.08 ± 0.00  |
| Germacrene-D-4-ol                | 1568 | 0.97 ± 0.08  | 0.70 ± 0.06 | 3.61 ± 0.09  | 1.43 ± 0.04  | 0.18 ± 0.02  | 0.03 ± 0.00  | 0.00 ± 0.00  |
| 5-epi-7-epi-alpha-Eudesmol       | 1598 | 0.25 ± 0.01  | 0.00 ± 0.00 | 0.00 ± 0.00  | 0.00 ± 0.00  | 0.19 ± 0.03  | 0.31 ± 0.03  | 0.43 ± 0.05  |
| Eudesm-5-en-11-ol                | 1603 | 0.03 ± 0.00  | 0.00 ± 0.00 | 0.00 ± 0.00  | 0.00 ± 0.00  | 0.03 ± 0.00  | 0.01 ± 0.00  | 0.03 ± 0.00  |
| 1,10-di-Epicubenol               | 1606 | 0.02 ± 0.00  | 0.00 ± 0.00 | 0.00 ± 0.00  | 0.02 ± 0.00  | 0.03 ± 0.00  | 0.01 ± 0.00  | 0.02 ± 0.00  |
| 10-epi-gamma-Eudesmol            | 1613 | 0.61 ± 0.00  | 0.00 ± 0.00 | 0.08 ± 0.00  | 0.26 ± 0.01  | 0.53 ± 0.04  | 0.77 ± 0.07  | 1.08 ± 0.09  |
| 1-Epicubenol                     | 1619 | 0.04 ± 0.00  | 0.00 ± 0.00 | 0.00 ± 0.00  | 0.04 ± 0.00  | 0.06 ± 0.00  | 0.05 ± 0.00  | 0.05 ± 0.00  |
| Agarospinol                      | 1622 | 0.41 ± 0.04  | 0.03 ± 0.00 | 0.28 ± 0.01  | 0.47 ± 0.05  | 0.54 ± 0.04  | 0.62 ± 0.05  | 0.73 ± 0.00  |
| gamma-Eudesmol                   | 1623 | 6.55 ± 0.15  | 0.05 ± 0.00 | 0.76 ± 0.03  | 2.14 ± 0.12  | 4.38 ± 0.22  | 6.73 ± 0.32  | 11.48 ± 0.40 |
| Hinesol                          | 1631 | 0.17 ± 0.02  | 0.00 ± 0.00 | 0.09 ± 0.00  | 0.00 ± 0.00  | 0.21 ± 0.01  | 0.24 ± 0.02  | 0.31 ± 0.03  |

|                                     |      |                     |                    |                     |                     |                     |                     |                     |
|-------------------------------------|------|---------------------|--------------------|---------------------|---------------------|---------------------|---------------------|---------------------|
| tau-Cadinol                         | 1633 | 0.40 ± 0.04         | 0.00 ± 0.00        | 0.12 ± 0.01         | 0.29 ± 0.02         | 0.41 ± 0.03         | 0.24 ± 0.01         | 0.54 ± 0.04         |
| epi-alpha-Cadinol                   | 1635 | 0.48 ± 0.06         | 0.00 ± 0.00        | 0.17 ± 0.00         | 0.43 ± 0.04         | 0.54 ± 0.04         | 0.54 ± 0.06         | 0.60 ± 0.08         |
| delta-Cadinol                       | 1638 | 0.13 ± 0.02         | 0.00 ± 0.00        | 0.02 ± 0.00         | 0.08 ± 0.00         | 0.12 ± 0.01         | 0.15 ± 0.01         | 0.20 ± 0.02         |
| beta-Eudesmol + alpha-Eudesmol      | 1646 | 13.10 ± 0.28        | 0.38 ± 0.04        | 3.86 ± 0.09         | 8.05 ± 0.11         | 11.99 ± 0.26        | 15.14 ± 0.42        | 21.64 ± 0.51        |
| 7-epi-alpha-Eudesmol                | 1652 | 0.08 ± 0.00         | 0.00 ± 0.00        | 0.03 ± 0.00         | 0.02 ± 0.00         | 0.05 ± 0.00         | 0.08 ± 0.00         | 0.13 ± 0.01         |
| Bulnesol                            | 1656 | 0.06 ± 0.00         | 0.00 ± 0.00        | 0.00 ± 0.00         | 0.00 ± 0.00         | 0.02 ± 0.00         | 0.05 ± 0.00         | 0.12 ± 0.01         |
| Intermedeol                         | 1658 | 0.13 ± 0.00         | 0.00 ± 0.00        | 0.12 ± 0.00         | 0.16 ± 0.02         | 0.16 ± 0.01         | 0.14 ± 0.01         | 0.12 ± 0.01         |
| Benzyl benzoate                     | 1756 | 0.03 ± 0.00         | 0.00 ± 0.00        | 0.00 ± 0.00         | 0.00 ± 0.00         | 0.02 ± 0.00         | 0.00 ± 0.00         | 0.03 ± 0.00         |
| alpha-Eudesmol acetate              | 1773 | 0.01 ± 0.00         | 0.00 ± 0.00        | 0.00 ± 0.00         | 0.00 ± 0.00         | 0.02 ± 0.00         | 0.01 ± 0.00         | 0.02 ± 0.00         |
| <b>% Total OCS</b>                  |      | <b>51.12 ± 0.91</b> | <b>3.28 ± 0.12</b> | <b>27.44 ± 0.56</b> | <b>42.17 ± 0.65</b> | <b>49.73 ± 0.55</b> | <b>50.85 ± 0.69</b> | <b>62.39 ± 1.05</b> |
| <b>Diterpene Hydrocarbons</b>       |      |                     |                    |                     |                     |                     |                     |                     |
| Sclarene                            | 1890 | 0.03 ± 0.00         | 0.00 ± 0.00        | 0.03 ± 0.00         | 0.02 ± 0.00         | 0.03 ± 0.00         | 0.02 ± 0.00         | 0.01 ± 0.00         |
| Isopimara-9(11),15-diene            | 1893 | 0.20 ± 0.02         | 0.00 ± 0.00        | 0.19 ± 0.08         | 0.29 ± 0.02         | 0.35 ± 0.03         | 0.26 ± 0.01         | 0.19 ± 0.05         |
| Rosa-5,15-diene                     | 1921 | 2.11 ± 0.10         | 0.10 ± 0.00        | 1.43 ± 0.08         | 2.39 ± 0.12         | 2.73 ± 0.14         | 2.26 ± 0.09         | 1.66 ± 0.14         |
| Kryptomenen                         | 1923 | 0.58 ± 0.05         | 0.03 ± 0.00        | 0.44 ± 0.05         | 0.75 ± 0.05         | 0.83 ± 0.04         | 0.70 ± 0.06         | 0.52 ± 0.05         |
| Pimaradiene                         | 1934 | 0.86 ± 0.08         | 0.04 ± 0.00        | 0.62 ± 0.05         | 1.07 ± 0.07         | 1.25 ± 0.04         | 1.04 ± 0.08         | 0.79 ± 0.07         |
| Sandaracopimara-8(14),15-diene      | 1953 | 0.53 ± 0.05         | 0.01 ± 0.00        | 0.34 ± 0.03         | 0.62 ± 0.09         | 0.79 ± 0.04         | 0.70 ± 0.00         | 0.55 ± 0.05         |
| Isophyllocladene                    | 1959 | 0.05 ± 0.00         | 0.00 ± 0.00        | 0.02 ± 0.00         | 0.05 ± 0.00         | 0.07 ± 0.00         | 0.06 ± 0.00         | 0.05 ± 0.00         |
| Phyllocladene                       | 2010 | 14.00 ± 0.62        | 0.58 ± 0.05        | 7.21 ± 0.25         | 12.94 ± 0.24        | 16.42 ± 0.32        | 16.12 ± 0.37        | 14.20 ± 0.24        |
| Kaur-16-ene                         | 2032 | 0.05 ± 0.00         | 0.00 ± 0.00        | 0.03 ± 0.00         | 0.07 ± 0.00         | 0.11 ± 0.01         | 0.10 ± 0.00         | 0.10 ± 0.00         |
| Abietatriene                        | 2040 | 0.24 ± 0.01         | 0.00 ± 0.00        | 0.07 ± 0.00         | 0.13 ± 0.00         | 0.20 ± 0.01         | 0.23 ± 0.01         | 0.24 ± 0.01         |
| <b>% Total DHs</b>                  |      | <b>18.65 ± 0.40</b> | <b>0.76 ± 0.05</b> | <b>10.38 ± 0.22</b> | <b>18.33 ± 0.28</b> | <b>22.78 ± 0.38</b> | <b>21.49 ± 0.41</b> | <b>18.31 ± 0.32</b> |
| <b>Oxygen-Containing Diterpenes</b> |      |                     |                    |                     |                     |                     |                     |                     |
| Nezukol                             | 2119 | 2.59 ± 0.00         | 0.03 ± 0.00        | 0.66 ± 0.05         | 1.39 ± 0.10         | 2.12 ± 0.12         | 2.75 ± 0.11         | 3.47 ± 0.13         |
| Sandaracopimarinal                  | 2169 | 0.18 ± 0.01         | 0.00 ± 0.00        | 0.02 ± 0.00         | 0.05 ± 0.00         | 0.10 ± 0.02         | 0.13 ± 0.00         | 0.18 ± 0.01         |
| Phyllocladanol                      | 2198 | 0.03 ± 0.00         | 0.00 ± 0.00        | 0.00 ± 0.00         | 0.00 ± 0.00         | 0.00 ± 0.00         | 0.03 ± 0.00         | 0.04 ± 0.00         |
| 6,7-Dehydroferruginol               | 2300 | 0.03 ± 0.00         | 0.00 ± 0.00        | 0.00 ± 0.00         | 0.00 ± 0.00         | 0.00 ± 0.00         | 0.01 ± 0.00         | 0.03 ± 0.00         |
| trans-Ferruginol                    | 2304 | 0.07 ± 0.00         | 0.00 ± 0.00        | 0.00 ± 0.00         | 0.00 ± 0.00         | 0.01 ± 0.00         | 0.03 ± 0.00         | 0.05 ± 0.00         |
| <b>% Total OCD</b>                  |      | <b>2.90 ± 0.02</b>  | <b>0.03 ± 0.00</b> | <b>0.68 ± 0.05</b>  | <b>1.44 ± 0.10</b>  | <b>2.23 ± 0.14</b>  | <b>2.95 ± 0.11</b>  | <b>3.77 ± 0.14</b>  |
| <b>% Identification</b>             |      | <b>97.39</b>        | <b>99.75</b>       | <b>98.22</b>        | <b>97.27</b>        | <b>97.04</b>        | <b>97.15</b>        | <b>97.43</b>        |

Results are shown as means ± standard deviations (*n* = 3). RI-retention indices on a ZB5MSPlus column. DHs–diterpene hydrocarbons; Fr–fraction; GC/MS–gas chromatography/mass spectroscopy; HD–hydrodistillation; MHs–monoterpene hydrocarbons; OCD–oxygen-containing diterpenes; OCM–oxygen-containing monoterpenes; OCS–oxygen-containing sesquiterpenes; SHs–sesquiterpene hydrocarbons.
